# Supplementary material for: Extracellular vesicle-encapsulated CC16 as novel nanotherapeutics for treatment of acute lung injury
Source: PubMed Central journal article supplement — Mol Ther. 2023 Jan 11;31(5):1346–64. doi: 10.1016/j.ymthe.2023.01.009 (PMC10188639; doi:10.1016/j.ymthe.2023.01.009), 2023-01-11
Supplement: mmc1.pdf [file mmc1.pdf]

**YMTHE, Volume 31**

**Supplemental Information**

**Extracellular vesicle-encapsulated  
CC16 as novel nanotherapeutics for treatment  
of acute lung injury**

**Yohan Han, Yin Zhu, Sultan Almuntashiri, Xiaoyun Wang, Payaningal R. Somanath, Caroline A. Owen, and Duo Zhang**

## Supplemental Figures

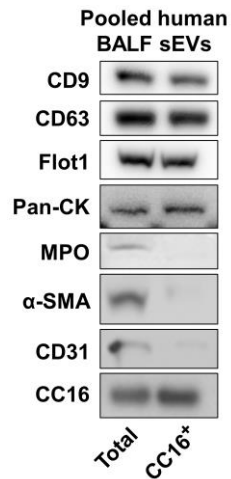

**fig. S1. CC16 positive sEVs (CC16<sup>+</sup> sEVs) are mainly released from epithelial cells.** BALF sEVs from pooled normal humans (n = 10) and pneumonia patients (n = 21) were examined by western blot. CC16<sup>+</sup> sEVs were purified by CC16 antibody-coated magnetic beads. sEVs positive markers (CD9, CD63, and Flot1) are detected in 50 μg of sEVs or CC16<sup>+</sup> sEVs. The Pan-CK, MPO, α-SMA, and CD31 were used as epithelial cell markers, neutrophil markers, smooth muscle cell markers, and endothelial cell markers, respectively.

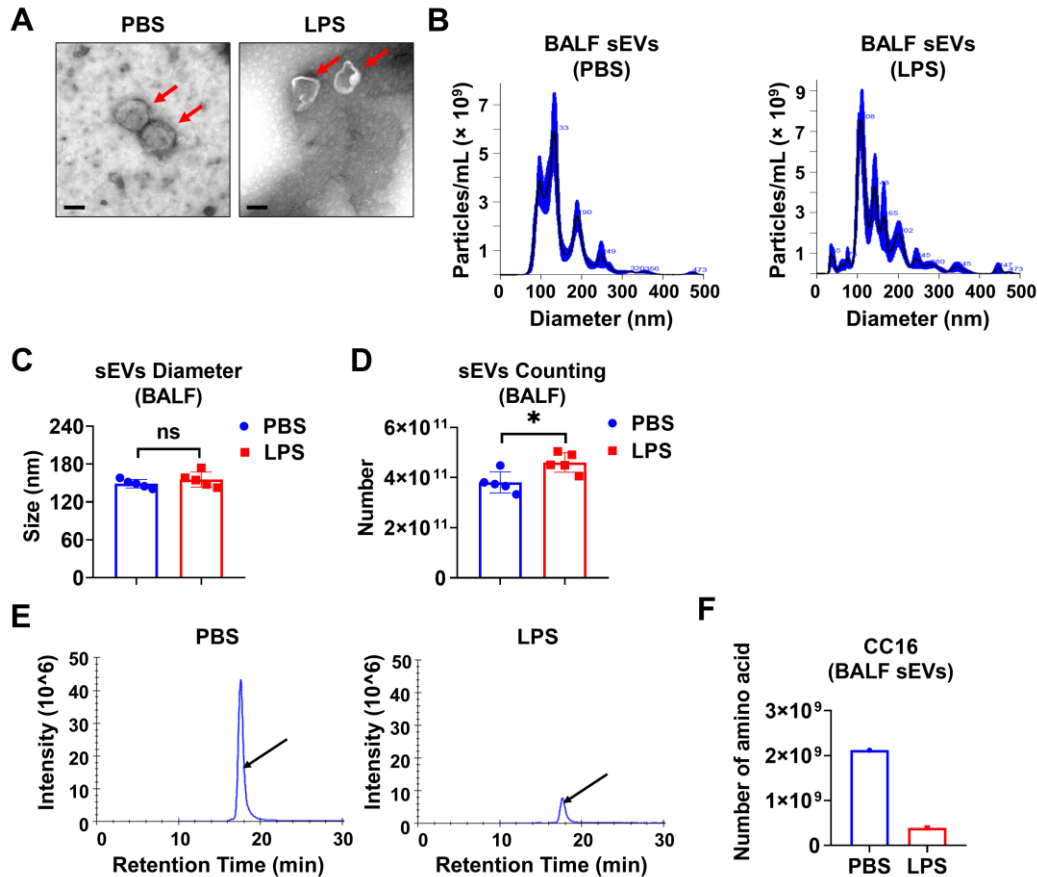

**fig. S2. LPS treatment reduces sEV-carried CC16 derived from murine BALF.** (A-D) Mice ( $n = 5$  per group) received 50  $\mu$ L PBS or 1  $\mu$ g LPS (in 50  $\mu$ L PBS) via i.t. Mice were sacrificed 24 h after treatment. BALF sEVs (200  $\mu$ g) from PBS- or LPS-treated mice ( $n = 5$ ) were isolated and then analyzed. Representative TEM images of sEVs were shown. Scale bar = 100 nm (A). Size distribution (B), average size (C), and particle numbers (D) were determined by NTA. Data are mean  $\pm$  SD. The data were analyzed using two-tailed unpaired Student's t-test. ns;  $p > 0.05$ ; \*,  $p < 0.05$ . (E and F) MS was used to measure the number of CC16-derived amino acids in 20  $\mu$ g pooled BALF sEVs from PBS- or LPS-treated mice ( $n = 5$ ).

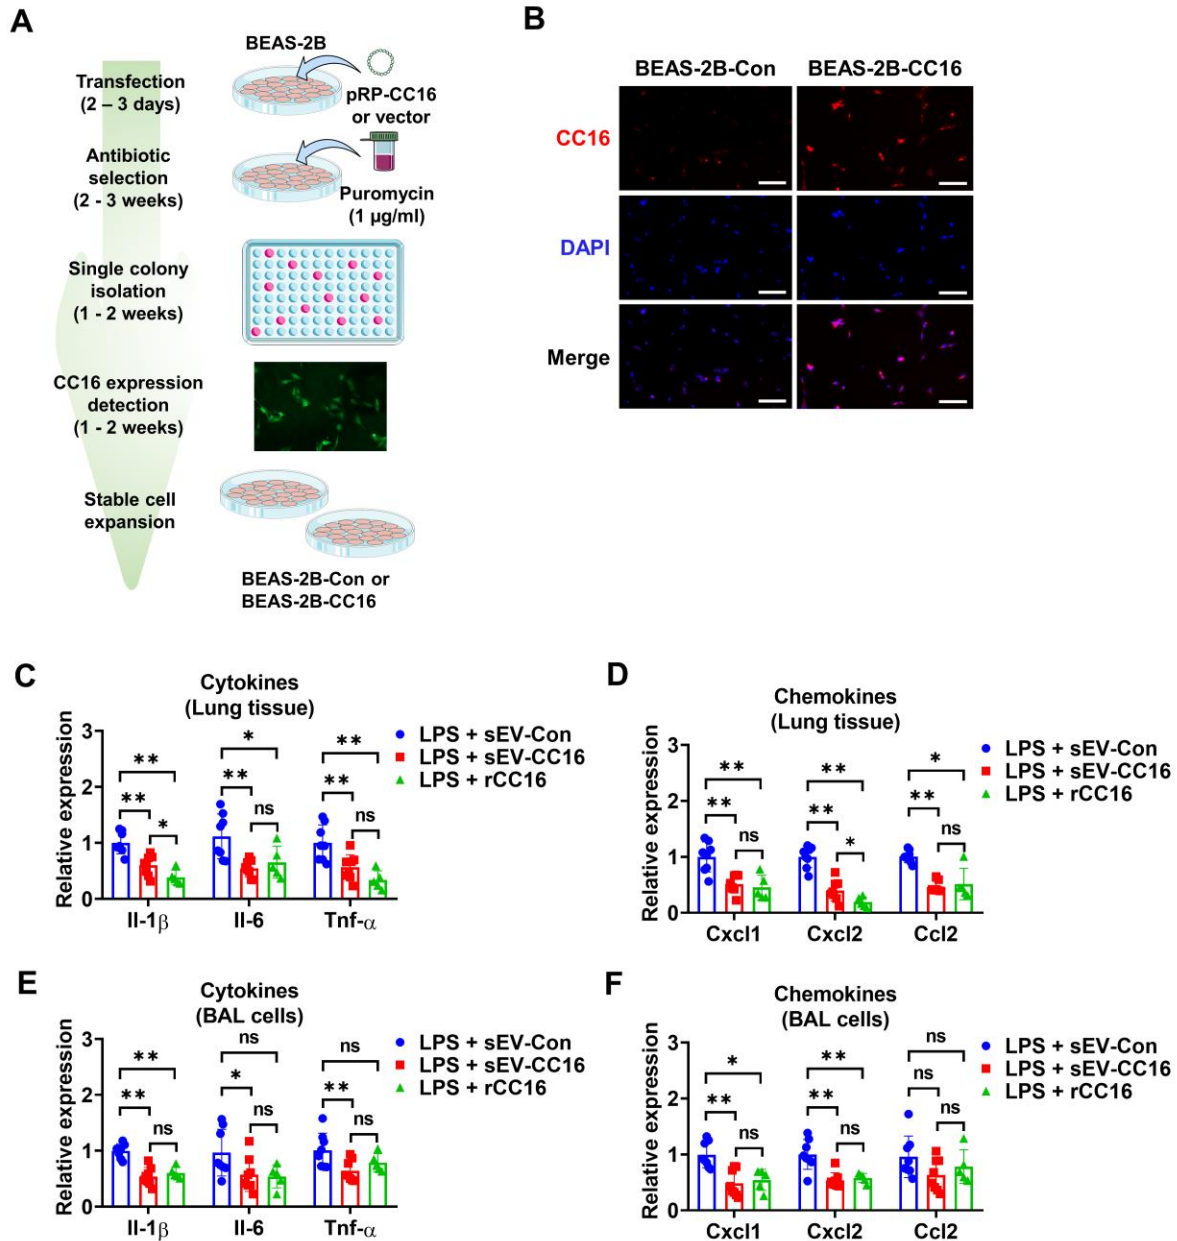

**fig. S3. sEV-CC16 generated from BEAS-2B with stable expression of CC16 protein inhibits cytokine and chemokine gene expressions in vivo.** (A) Schematic overview of generation of BEAS-2B with stable expression of CC16 protein. Electroporation-mediated transfection of pRP-CC16 or vector was conducted and stabilized the cells for 2 - 3 days. Stably transfected cells were selected using 1  $\mu$ g/mL puromycin. Parts of the figure were drawn by using pictures from Servier Medical Art (<http://smart.servier.com/>), licensed under a Creative Commons Attribution 3.0

Unported License (<https://creativecommons.org/licenses/by/3.0/>). **(B)** CC16 staining was performed on BEAS-2B-Con and BEAS-2B-CC16 using an antibody against CC16. Scale bar = 100  $\mu\text{m}$ . **(C-F)** LPS (1  $\mu\text{g}$  in 50  $\mu\text{L}$  PBS) was delivered into murine lungs (5 to 8 mice per group) via the i.t. route. After 3 h, mice were treated with  $7.5 \times 10^{10}$  (in 50  $\mu\text{L}$  PBS) sEV-Con, sEV-CC16, or 50  $\mu\text{g}$  (in 50  $\mu\text{L}$  PBS) rCC16 via the i.t. route. Lung tissue and BAL were collected 24 h after sEV administration. mRNA levels of cytokines **(C)** and chemokines (Cxcl1, Cxcl2, and Ccl2) **(D)** in lung tissues were measured by RT-qPCR. mRNA levels of cytokines (Il-1 $\beta$ , Il-6, and Tnf- $\alpha$ ) **(E)** and chemokines **(F)** (Cxcl1, Cxcl2, and Ccl2) in BAL cells were measured by RT-qPCR. Results represent mean  $\pm$  SD and were analyzed by a one-way ANOVA followed by Tukey's HSD. ns,  $p > 0.05$ ; \*,  $p < 0.05$ ; \*\*,  $p < 0.01$ .

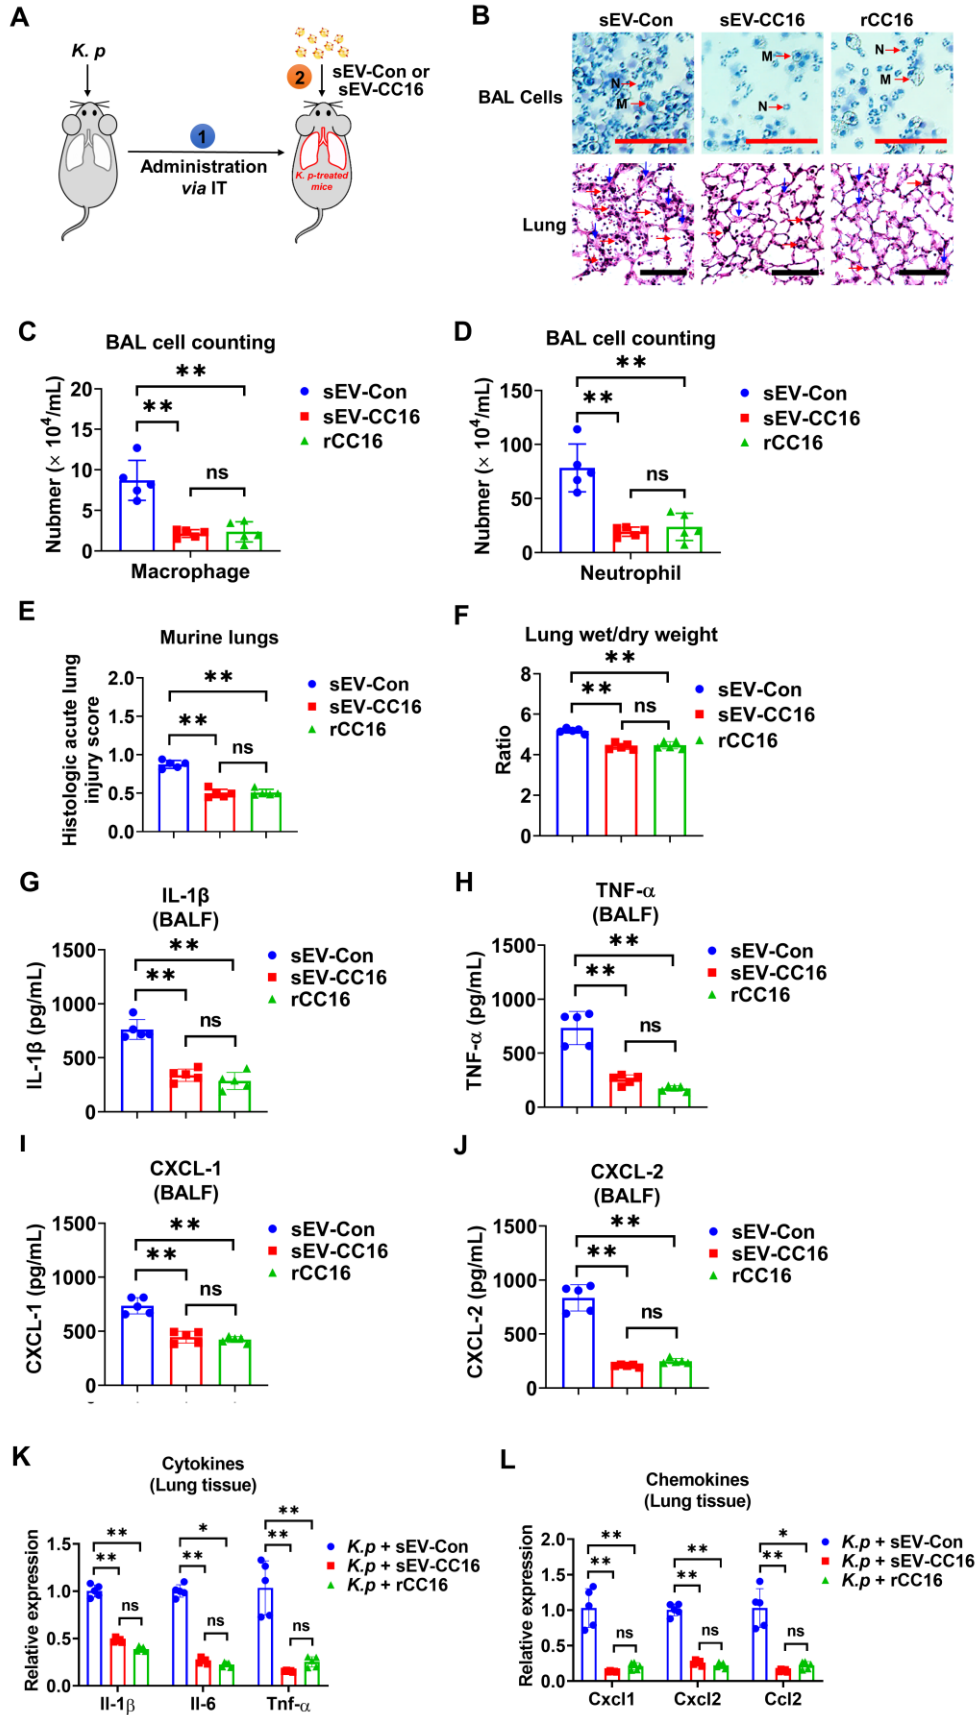

**fig. S4. sEV-CC16 protects *K. p*-induced lung injury in mice.** Mice (n = 5 per group) received  $5 \times 10^3$  CFU of *K. p* in 50  $\mu$ L PBS via i.t. After 3 h, mice were given sEV-Con ( $7.5 \times 10^{10}$  in 50  $\mu$ L PBS), sEV-CC16 ( $7.5 \times 10^{10}$  in 50  $\mu$ L PBS), or rCC16 (2 mg/kg body weight) via the i.t. route. Mice were sacrificed 24 h after sEVs treatment. Schematic illustration of delivery of sEV-Con and sEV-CC16 into *K. p*-pretreated mice (A). H&E staining was performed using BAL cells and lung sections. M: macrophage; N: neutrophil; Red arrows: neutrophils; Blue arrows: increased alveolar disruption with hyaline membranes. Scale bar = 100  $\mu$ m (B). (C-D) The number of macrophages (C) or neutrophils (D) from BALF was counted. Lung injury was scored based on histological images (n = 5 per group) (E). Lung wet to dry weight ratios were calculated (F). Protein levels of IL-1 $\beta$  (G), TNF- $\alpha$  (H), CXCL-1 (I), and CXCL-2 (J) in BALF were detected using ELISAs. mRNA levels of cytokines (Il-1 $\beta$ , Il-6, and Tnf- $\alpha$ ) (K) and chemokines (Cxcl1, Cxcl2, and Ccl2) (L) in lung tissues were measured by RT-qPCR. The results were presented as mean  $\pm$  SD. The data were analyzed by a one-way ANOVA followed by Tukey's HSD. ns, p > 0.05; \*, p < 0.05; \*\*, p < 0.01.

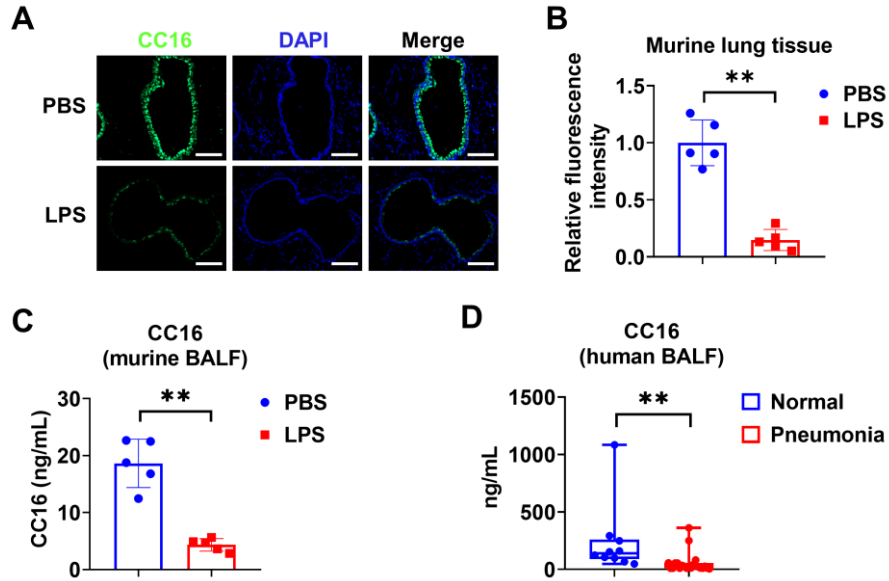

**fig. S5. LPS-induced lung injury decreases CC16 level of lung and BALF.** (A-B) Mice ( $n = 5$  per group) received  $1 \mu\text{g}$  LPS (in  $50 \mu\text{L}$  PBS) via i.t. After 24 h, mice were sacrificed for immunofluorescence staining of lung tissue (A). Scale bar =  $100 \mu\text{m}$ . Relative fluorescence intensity is measured by Image J software (B). (C) Protein level of CC16 in BALF without EVs was detected using ELISAs. (D) Protein level of CC16 in normal human ( $n = 10$ ) BALF without EVs and pneumonia patients ( $n = 21$ ) BALF without EVs is detected using ELISAs. The results presented as mean  $\pm$  SD. In panels B and C, results are analyzed by two-tailed unpaired Student's t-test. In panel D, the boxes in the boxplots show the medians with 25th and 75th percentiles, and the whiskers show the Min and Max value. Data are analyzed using a Kruskal-Wallis one-way ANOVA followed by pairwise testing with Mann-Whitney U tests. \*\*,  $p < 0.01$ .



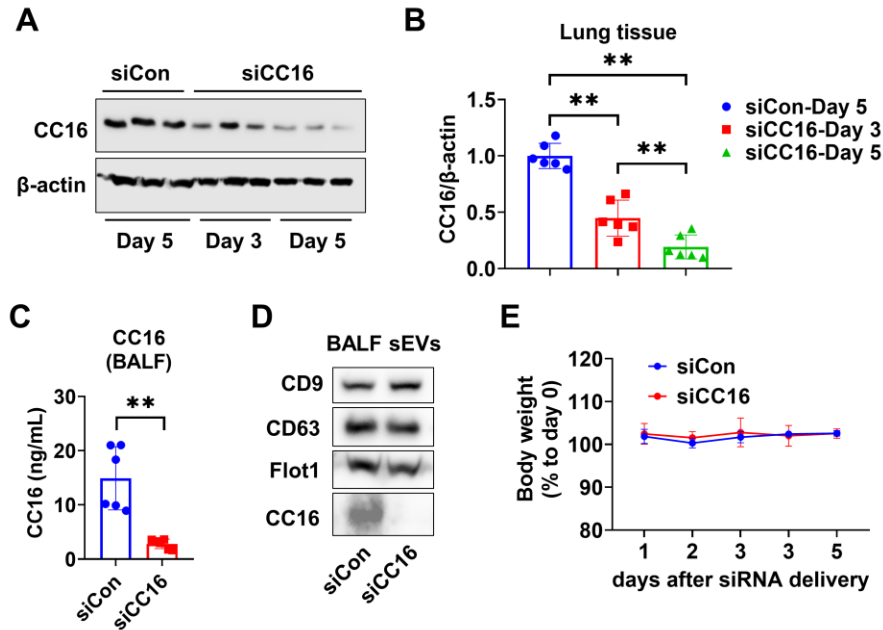

**fig.S6. Characterization of CC16 knockdown mice and sEVs isolated from BALF.** Mice (n = 6 per group) receive control siRNA (siCon) or CC16 siRNA (siCC16) via i.t. After 3 days and 5 days, mice were sacrificed. **(A)** Protein level of CC16 in the lung tissue is taken by western blot. β-actin is used as loading control. **(B)** Band intensity is measured by Image J software and CC16 expression level is normalized by β-actin. **(C)** Protein level of CC16 in BALF is detected using ELISAs. **(D)** sEVs are isolated from BALF 5 days after siCon or siCC16 treated mice. sEVs positive markers (CD9, CD63, and Flot1) and CC16 are detected in 100 μg sEVs protein using western blot. **(E)** Results are presented as mean ± SD. In panel **B**, Data are analyzed by one-way ANOVA followed by Tukey's HSD. In panels **C** and **E**, results are analyzed by two-tailed unpaired Student's t-test. \*\*, p < 0.01.

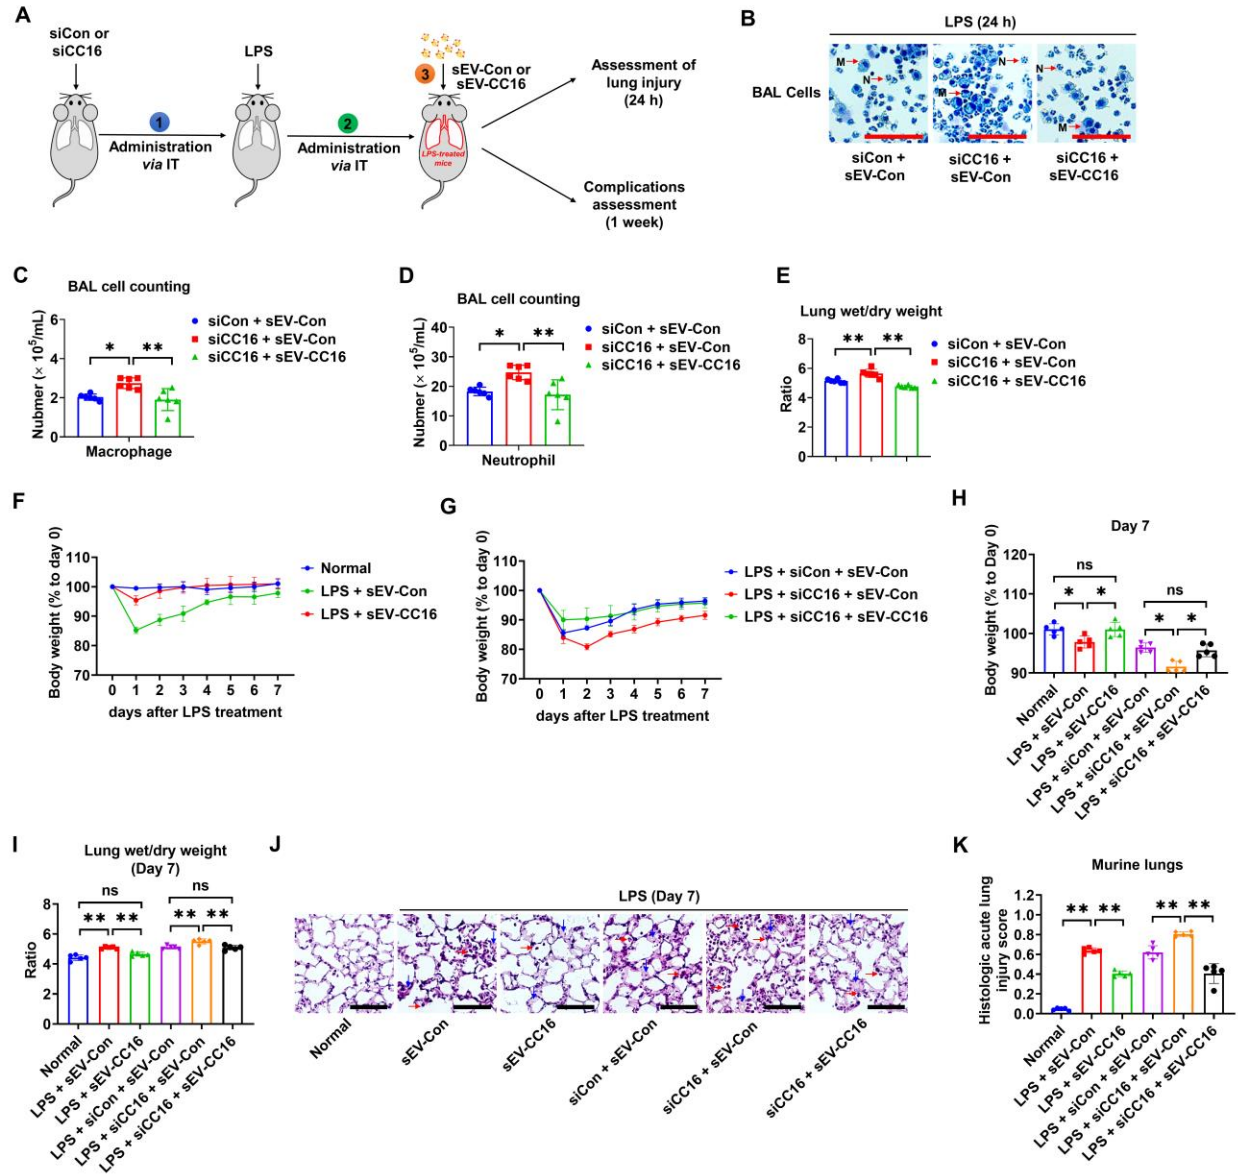

**fig. S7. sEV-CC16 ameliorates LPS-induced lung injury without complications.** Schematic illustration of delivery of sEV-Con and sEV-CC16 into LPS-pretreated mice after CC16 knockdown (A). Mice were intratracheally treated with CC16 siRNA and maintained for 5 days. After inducing knockdown, LPS treatment was applied, and sEV-Con or sEV-CC16 was treated 3 hours later. Mice were then maintained for 24 h (B-E; n = 6 per group) or 1 week (F-K; n = 5 per group). H&E staining of BAL cells. M: macrophage; N: neutrophil. Scale bar = 100  $\mu$ m (B). The number of BALF macrophages (C) or neutrophils (D). Lung wet to dry weight ratios (E). Weight

change ratio of mice body was recorded after inducing CC16 knockdown (**F-H**). Lung wet-to-dry weight ratios on day 7 (**I**). H&E staining of lung sections (**J**). Red arrows: neutrophils; Blue arrows: alveolar disruption with hyaline membranes. Scale bar = 100  $\mu\text{m}$ . Lung injury scored (**K**). Results represent mean  $\pm$  SD and the data is analyzed by a one-way ANOVA followed by Tukey's HSD. ns,  $p > 0.05$ ; \*,  $p < 0.05$ ; \*\*,  $p < 0.01$ .

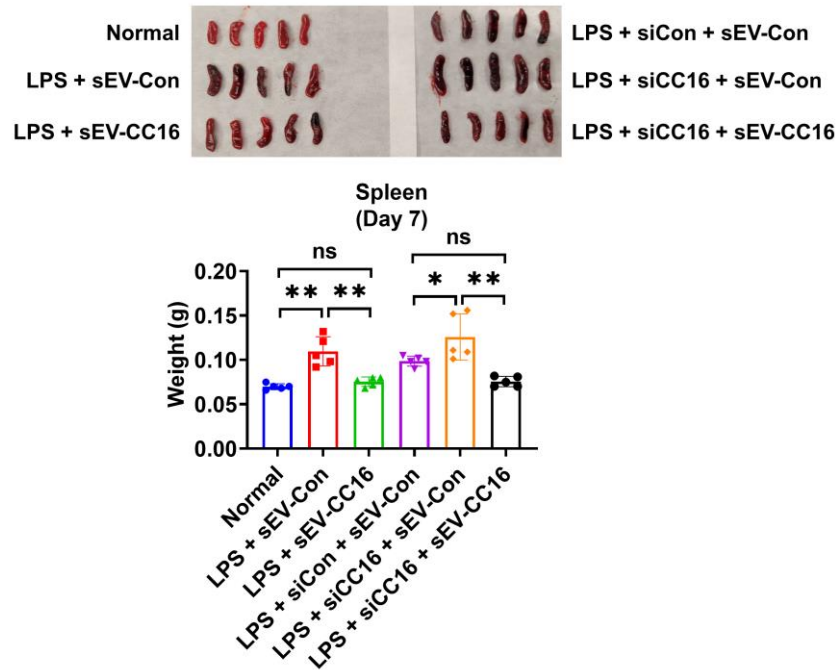

**fig.S8. sEV-CC16 prevents enlargement of the spleen.** Mice (n = 5 per group) receive control siRNA (siCon) or CC16 siRNA (siCC16) via i.t. After 5 days, received 1  $\mu$ g LPS (in 50  $\mu$ L PBS) via i.t. After 3 h, mice were given sEV-Con ( $7.5 \times 10^{10}$  in 50  $\mu$ L PBS) or sEV-CC16 ( $7.5 \times 10^{10}$  in 50  $\mu$ L PBS) via the i.t. route. After 1 week, the spleen was collected for image and weight change confirmation (A-B). Results are presented as mean  $\pm$  SD and are analyzed by one-way ANOVA followed by Tukey's HSD. ns,  $p > 0.05$ ; \*,  $p < 0.05$ ; \*\*,  $p < 0.01$ .

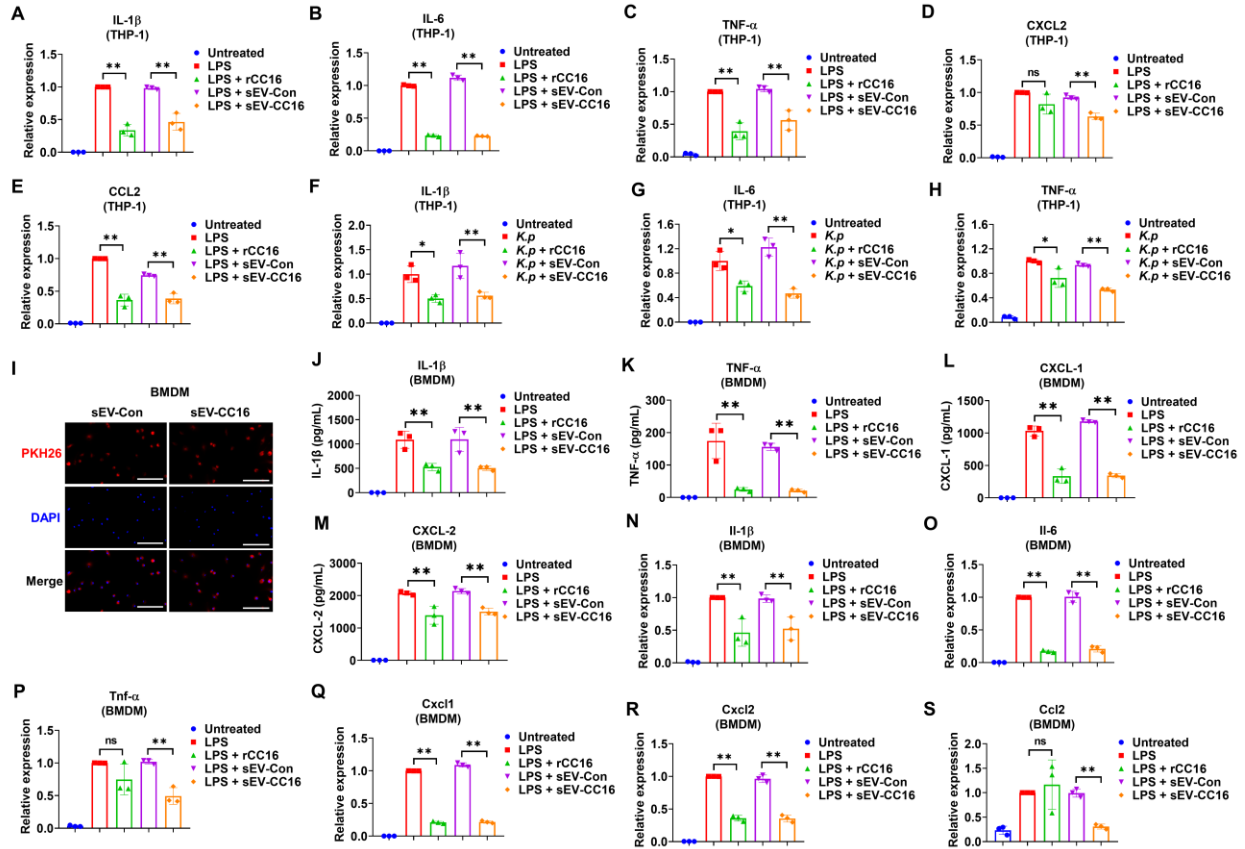

**fig. S9. sEV-CC16 inhibits cytokine and chemokine expression in macrophage-like cells. (A-E)** 100 ng/mL LPS-treated THP-1 cells were incubated with  $5 \times 10^8$ /mL sEV-Con, sEV-CC16, or 1  $\mu$ g/mL rCC16 for 24 h. mRNA levels of cytokines (IL-1 $\beta$ , IL-6, and TNF- $\alpha$ ) and chemokines (CXCL2 and CCL2) were measured by RT-qPCR (n = 3 per group). **(F-H)** THP-1 cells were infected with *K.p* (MOI 1:5) for 1 h and then were incubated with  $5 \times 10^8$ /mL sEV-Con, sEV-CC16, or 1  $\mu$ g/mL rCC16 for 24 h. mRNA levels of IL-1 $\beta$ , IL-6, and TNF- $\alpha$  were measured by RT-qPCR (n = 3 per group). Results represent mean  $\pm$  SD and were analyzed by a one-way ANOVA followed by Tukey's HSD. \*, p < 0.05; \*\*, p < 0.01. **(I-S)** 100 ng/mL LPS-treated BMDM were incubated with  $5 \times 10^8$ /mL sEV-Con, sEV-CC16, or 1  $\mu$ g/mL rCC16 for 24 h. PKH26-labeled sEV-Con or sEV-CC16 were added to BMDM for 24 h and the internalization of sEV was observed using a fluorescence microscope. Scale bar = 100  $\mu$ m **(I)**. The secretion of cytokines (IL-1 $\beta$  and TNF- $\alpha$ )

and chemokines (CXCL-1 and CXCL-2) was measured by ELISA (n = 3 per group) (**J-M**). mRNA levels of cytokines (Il-1 $\beta$ , Il-6, and Tnf- $\alpha$ ) and chemokines (Cxcl-1, Cxcl-2, and Ccl2) were determined by RT-qPCR (n = 3 per group) (**N-S**). Results represent mean  $\pm$  SD and were analyzed by one-way ANOVA followed by Tukey's HSD. ns, p > 0.05; \*\*, p < 0.01.

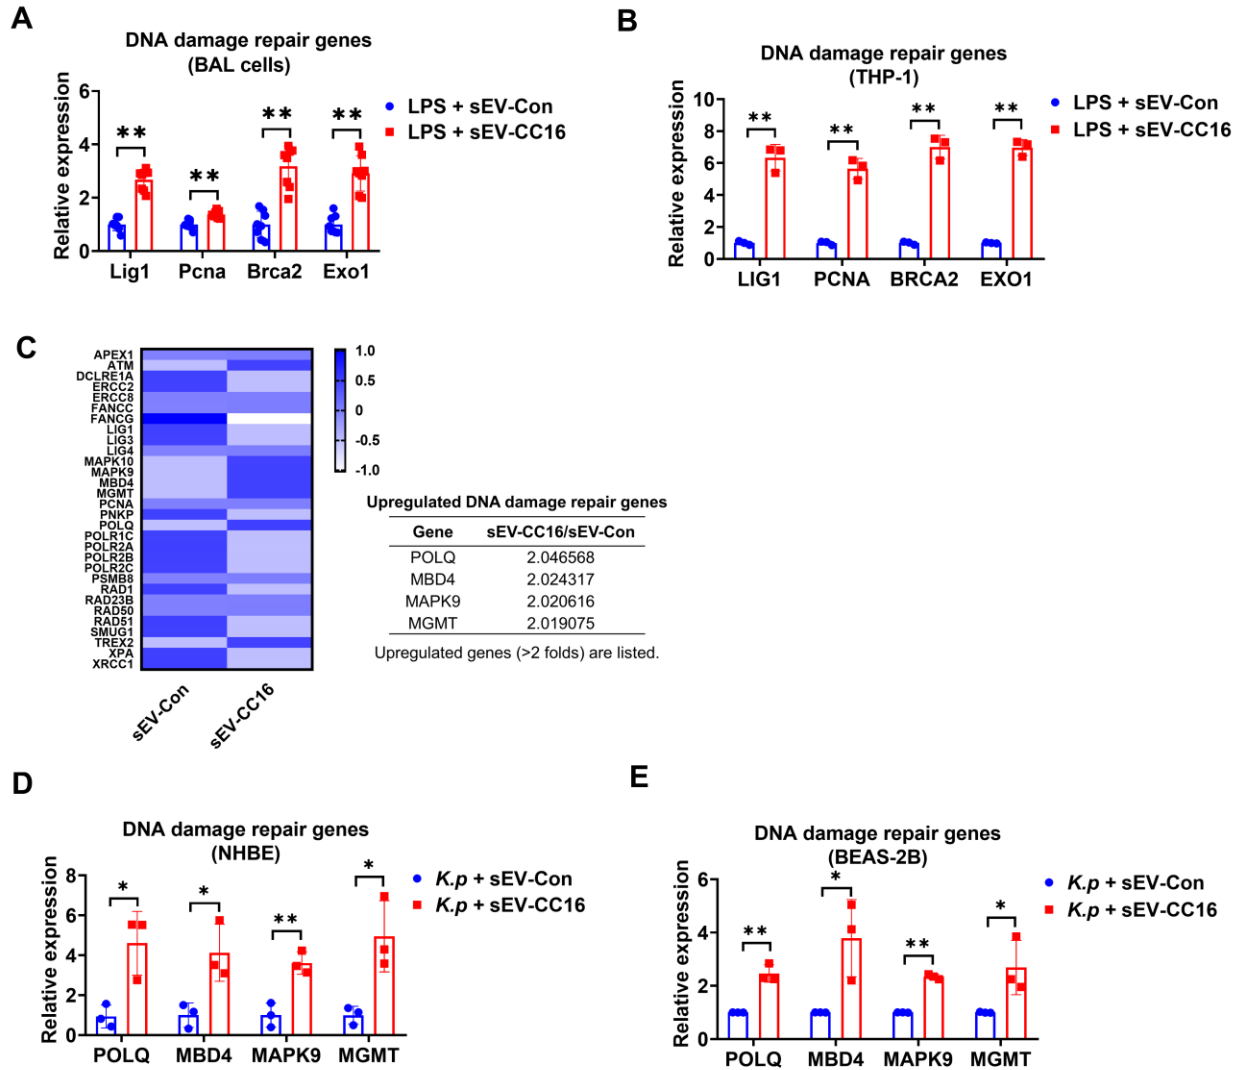

**fig. S10. sEV-CC16 induces DNA damage response genes.** (A) Mice received 1  $\mu$ g LPS in (50  $\mu$ L PBS) via the i.t. route. After 3 h, mice were treated with sEV-Con or sEV-CC16 via the i.t. route. Mice were sacrificed 24 h after sEV treatment. mRNA levels of Lig1, PcnA, Brca2, and Exo1 are determined by RT-qPCR in BAL cells ( $n = 8$  per group). (B) 100 ng/mL LPS-treated THP-1 cells were incubated with  $5 \times 10^8$ /mL sEV-Con, sEV-CC16, or 1  $\mu$ g/mL rCC16 for 24 h. DNA damage response genes were measured by RT-qPCR. (C-E) *K.p*-infected (MOI 1:5) NHBE or BEAS-2B were treated with  $5 \times 10^8$ /mL sEV-Con or sEV-CC16. mRNAs from treated NHBE were subject to TaqMan™ Array Human DNA Repair Mechanism analysis and upregulated genes

are listed (n = 3 per group) (C). Upregulated genes were confirmed using RT-qPCR in NHBE (D) and BEAS-2B cells (E). Results were represented as mean  $\pm$  SD and analyzed by two-tailed unpaired Student's t-test. \*, p < 0.05; \*\*, p < 0.01.



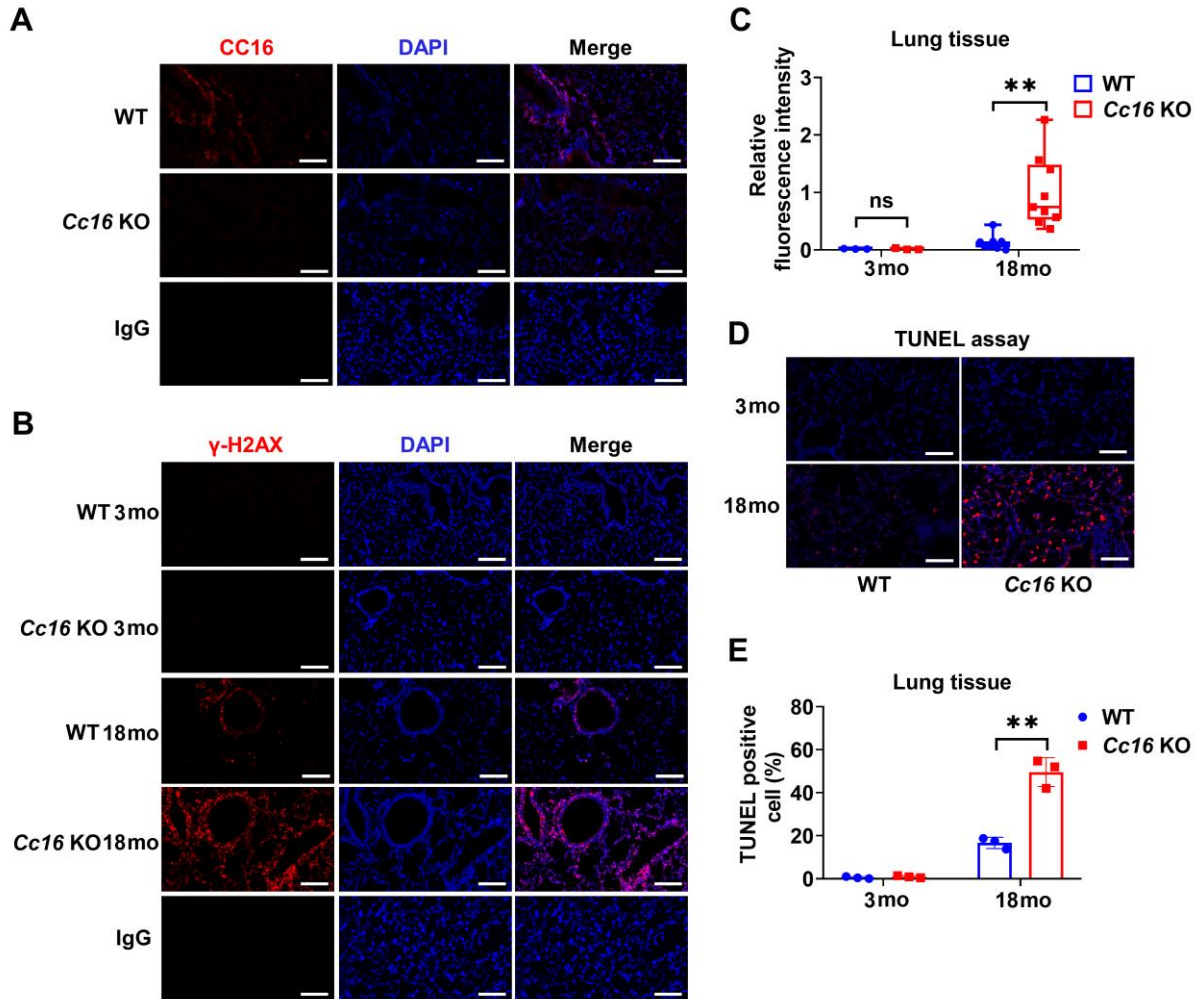

**fig. S11. *Cc16* deficiency results in increased DNA damage in mice.** Untreated WT mice and *Cc16* KO mice were maintained in normal condition for 3 months or 18 months. **(A)** Lung sections from 3-month-old WT and *Cc16* KO mice were stained using an antibody against CC16 (n = 3 per group). Non-immune rabbit IgG was used as a negative control. Scale bar = 100  $\mu$ m. **(B)** Immunofluorescence staining was performed in lung sections from 3-month-old (n = 3 per group) or 18-month-old (n = 8-9 per group) WT and *Cc16* KO mice using an antibody against  $\gamma$ -H2AX. Lung sections from 18-month-old WT mice were stained with non-immune rabbit IgG. Scale bar = 100  $\mu$ m. **(C)** Relative fluorescence intensity is measured by Image J software (n = 3 for 3-month-old WT and *Cc16* KO mice; n = 8 for 18-month-old WT mice; n = 9 for 18-month-old *Cc16* KO

mice). The boxes in the boxplots show the medians with 25th and 75th percentiles, and the whiskers show the Min and Max values. The data is analyzed using two-tailed unpaired Mann-Whitney U test. ns,  $p > 0.05$ ; \*\*,  $p < 0.01$ . **(D)** DNA damage in the lung was measured by TUNEL staining. Scale bar = 100  $\mu\text{m}$ . **(E)** The percentage of TUNEL-positive cells is calculated ( $n = 3$  per group). Results represented mean  $\pm$  SD and are analyzed using two-tailed unpaired Student's t-test. ns,  $p > 0.05$ ; \*\*,  $p < 0.01$ .

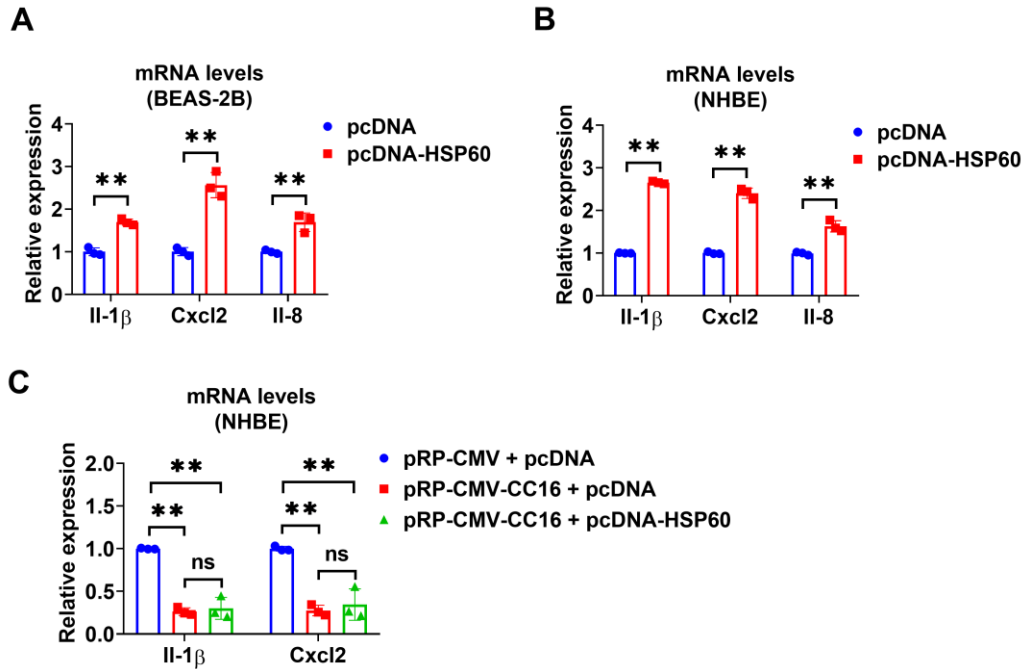

**fig. S12. CC16 suppresses mRNA levels of cytokines through interaction with HSP60. (A-C)**

mRNA levels of IL-1 $\beta$ , CXCL2, and IL-8 are detected after transfection of HSP60 and/or CC16 plasmid as indicated. In panel **A-B**, results are mean  $\pm$  SD of 3 independent experiments and analyzed by two-tailed unpaired Student's t-test. In panel **C**, the results of 3 independent experiments are represented as mean  $\pm$  SD and analyzed by a one-way ANOVA followed by Tukey's HSD. ns,  $p > 0.05$ ; \*\*,  $p < 0.01$ .

**Table S1 Clinical characteristics of study subjects**

| <b>Characteristics</b>      | <b>Normal (N = 10)</b> | <b>Pneumonia (N = 21)</b> | <b>p-Value</b>   |                |                                                                                                  |
|-----------------------------|------------------------|---------------------------|------------------|----------------|--------------------------------------------------------------------------------------------------|
| Age (years), mean (SD)      | 60.2 ± 17.7            | 55.7 ± 16.6               | <i>N.S</i>       |                |                                                                                                  |
| Number of males (%)         | 4 (40)                 | 12 (57)                   | <i>N.S</i>       |                |                                                                                                  |
| <b>Detailed information</b> |                        |                           |                  |                |                                                                                                  |
| <b>Sample #</b>             | <b>Age (years)</b>     | <b>Gender</b>             | <b>Pneumonia</b> | <b>Source</b>  | <b>Sample details</b>                                                                            |
| 1                           | 74                     | Male                      | No               | BioIVT         | Normal donor without diseases including COPD, Idiopathic Pulmonary Fibrosis and Cystic Fibrosis. |
| 2                           | 66                     | Female                    | No               | BioIVT         | Normal donor without diseases including COPD, Idiopathic Pulmonary Fibrosis and Cystic Fibrosis. |
| 3                           | 53                     | Male                      | No               | BioIVT         | Normal donor without diseases including COPD, Idiopathic Pulmonary Fibrosis and Cystic Fibrosis. |
| 4                           | 44                     | Female                    | No               | BioIVT         | Normal donor without diseases including COPD, Idiopathic Pulmonary Fibrosis and Cystic Fibrosis. |
| 5                           | 23                     | Female                    | No               | BioIVT         | Normal donor without diseases including COPD, Idiopathic Pulmonary Fibrosis and Cystic Fibrosis. |
| 6                           | 76                     | Female                    | No               | BioIVT         | Normal donor without diseases including COPD, Idiopathic Pulmonary Fibrosis and Cystic Fibrosis. |
| 7                           | 68                     | Male                      | No               | BioIVT         | Normal donor without diseases including COPD, Idiopathic Pulmonary Fibrosis and Cystic Fibrosis. |
| 8                           | 50                     | Female                    | No               | BioIVT         | Normal donor without diseases including COPD, Idiopathic Pulmonary Fibrosis and Cystic Fibrosis. |
| 9                           | 67                     | Female                    | No               | BioIVT         | Normal donor without diseases including COPD, Idiopathic Pulmonary Fibrosis and Cystic Fibrosis. |
| 10                          | 81                     | Male                      | No               | BioIVT         | Normal donor without diseases including COPD, Idiopathic Pulmonary Fibrosis and Cystic Fibrosis. |
| 11                          | 82                     | Male                      | Yes              | Discovery Life | Pneumonia positive (Escherichia coli)                                                            |

|    |    |        |     |                                      |                                                                                                    |
|----|----|--------|-----|--------------------------------------|----------------------------------------------------------------------------------------------------|
|    |    |        |     | Sciences<br>Inc                      |                                                                                                    |
| 12 | 55 | Male   | Yes | Discovery<br>Life<br>Sciences<br>Inc | Pneumonia positive (Staphylococcus<br>lugdunensis, Methicillin resistant<br>Staphylococcus aureus) |
| 13 | 78 | Male   | Yes | Discovery<br>Life<br>Sciences<br>Inc | Pneumonia positive (Pseudomonas<br>aeruginosa)                                                     |
| 14 | 65 | Female | Yes | Discovery<br>Life<br>Sciences<br>Inc | Pneumonia positive (Pseudomonas<br>aeruginosa)                                                     |
| 15 | 55 | Female | Yes | Discovery<br>Life<br>Sciences<br>Inc | Pneumonia positive (Gram-negative<br>bacilli)                                                      |
| 16 | 19 | Female | Yes | Discovery<br>Life<br>Sciences<br>Inc | Pneumonia positive (Providencia<br>stuartii   Achrombacter xylooxidans/<br>proteus mirabilis)      |
| 17 | 31 | Male   | Yes | Discovery<br>Life<br>Sciences<br>Inc | Pneumonia positive (Gram-negative<br>bacilli)                                                      |
| 18 | 42 | Male   | Yes | Discovery<br>Life<br>Sciences<br>Inc | Pneumonia positive (Gram-negative<br>bacilli)                                                      |
| 19 | 31 | Male   | Yes | Discovery<br>Life<br>Sciences<br>Inc | Pneumonia positive (Gram-negative<br>bacilli)                                                      |
| 20 | 45 | Male   | Yes | BioLINCC                             | ARDS positive, primary pneumonia                                                                   |
| 21 | 44 | Male   | Yes | BioLINCC                             | ARDS positive, primary aspiration,<br>secondary pneumonia, secondart<br>trauma                     |
| 22 | 60 | Female | Yes | BioLINCC                             | ARDS positive, primary pneumonia                                                                   |
| 23 | 71 | Female | Yes | BioLINCC                             | ARDS positive, primary pneumonia                                                                   |
| 24 | 45 | Male   | Yes | BioLINCC                             | ARDS positive, primary pneumonia                                                                   |
| 25 | 71 | Male   | Yes | BioLINCC                             | ARDS positive, primary pneumonia                                                                   |
| 26 | 65 | Female | Yes | BioLINCC                             | ARDS positive, primary sepsis site<br>lung pleura, primary pneumonia                               |
| 27 | 60 | Female | Yes | BioLINCC                             | ARDS positive, primary pneumonia                                                                   |
| 28 | 71 | Female | Yes | BioLINCC                             | ARDS positive, primary pneumonia                                                                   |
| 29 | 71 | Male   | Yes | BioLINCC                             | ARDS positive, primary pneumonia                                                                   |
| 30 | 44 | Male   | Yes | BioLINCC                             | ARDS positive, primary aspiration,<br>secondary pneumonia, secondart<br>trauma                     |
| 31 | 65 | Female | Yes | BioLINCC                             | ARDS positive, primary sepsis site<br>lung pleura, primary pneumonia                               |

**Table S2 WikiPathway**

**Table S3 DNA oligo sequences**

|              | <b>Name</b>           | <b>Forward primer (5' to 3')</b> | <b>Reverse primer (5' to 3')</b> |
|--------------|-----------------------|----------------------------------|----------------------------------|
| qPCR primers | mouse IL-10           | GCTCTTACTGACTGGCATGAG            | CGCAGCTCTAGGAGCATGTG             |
|              | mouse Il-1 $\beta$    | TGGACCTTCCAGGATGAGGAC<br>A       | GTTTCATCTCGGAGCCTGTAGT<br>G      |
|              | mouse Tnf- $\alpha$   | CCCTCACACTCAGATCATCTT<br>CT      | GCTACGACGTGGGCTACAG              |
|              | mouse Cxcl-1          | CTGGGATTCACCTCAAGAACA<br>TC      | CAGGGTCAAGGCAAGCCTC              |
|              | mouse Cxcl-2          | CCAACCACCAGGCTACAGG              | GCGTCACACTCAAGCTCTG              |
|              | mouse IL-6            | TAGTCCTTCCCTACCCCAATTC<br>C      | TTGGTCCTTAGCCACTCCTTC            |
|              | mouse Ccl2            | TTAAAAACCTGGATCGGAACC<br>AA      | GCATTAGCTTCAGATTTACGG<br>GT      |
|              | mouse Lig1            | TTCTGAGCTGTGAAGGGGAG             | GACGCTTTGGGAATCCTGATG            |
|              | mouse PcnA            | TTTGAGGCACGCCTGATCC              | GGAGACGTGAGACGAGTCCAT            |
|              | mouse Brca2           | ATGCCCGTTGAATACAAAAGG<br>A       | ACCGTGGGGCTTATACTCAGA            |
|              | mouse Exo1            | TGGCTGTGGATACCTACTGTT            | ATCGGCTTGACCCATAAGAC             |
|              | mouse Tbp             | TCAAACCCAGAATTGTTCTCC            | GGGGTAGATGTTTTCAAATGC            |
|              | human Il-1 $\beta$    | CCACAGACCTTCCAGGAGAAT<br>G       | GTGCAGTTCAGTGATCGTACA<br>GG      |
|              | human Tnf- $\alpha$   | CTCTTCTGCCTGCTGCACTTTG           | ATGGGCTACAGGCTTGTCACT<br>C       |
|              | human Cxcl-1          | AGG GAA TTC ACC CCA AGA<br>AC    | ACT ATG GGG GAT GCA GGA<br>TT    |
|              | human Cxcl-2          | CCCATGGTTAAGAAAATCATC<br>G       | CTTCAGGAACAGCCACCAAT             |
|              | human Il-8            | CTGTGTGAAGGTGCAGTTTTG<br>CC      | CTCAGCCCTCTTCAAAAACCTC<br>TCC    |
|              | human IL-6            | ACTCACCTCTTCCAGAACGAAT<br>TG     | CCATCTTTGGAAGGTTTCAGGT<br>TG     |
|              | human Ccl2            | CCCCAGTCACCTGCTGTTAT             | TGGAATCCTGAACCCACTTC             |
|              | human Lig1            | GCCCTGCTAAAGGCCAGAAG             | CATGGGAGAGGTGTCAGAGAG            |
| human PcnA   | CCTGCTGGGATATTAGCTCCA | CAGCGGTAGGTGTCGAAGC              |                                  |

|                    |                |                                   |                                                     |
|--------------------|----------------|-----------------------------------|-----------------------------------------------------|
|                    | human<br>Brca2 | CACCCACCCTTAGTTCTACTGT            | CCAATGTGGTCTTTGCAGCTAT                              |
|                    | human<br>Exo1  | CCTCGTGGCTCCCTATGAAG              | AGGAGATCCGAGTCCTCTGTA<br>A                          |
|                    | human<br>Polq  | CTGCGTCGGAGTGGGAAAC               | CTGTAGGCTTGCATTCTCCTG<br>GCAGAAGCGATGGGTTCTTGT<br>A |
|                    | human<br>Mbd4  | CCGTCACCTCTAGTGAGCG               | TCCAGCTCCATGTGAATAACC<br>T                          |
|                    | human<br>Mapk9 | GAAACTAAGCCGTCCTTTTCA<br>GA       | GGAGCTTTATTTTCGTGCAGAC<br>C                         |
|                    | human<br>Mgmt  | ACCGTTTGCGACTTGGTACTT             | GATAAGAGAGCCACGAACCAC                               |
|                    | human<br>Tbp   | GATAAGAGAGCCACGAACCA<br>C         | CCGCTCGAGGAACATGCCACC<br>TCCCATAC                   |
| Cloning<br>primers | human<br>HSP60 | CGGGGTACCATGCTTCGGTTA<br>CCCACAGT | CCGCTCGAGGAACATGCCACC<br>TCCCATAC                   |
